# Supplementary material for: Application of the Hybrid MCDM Method for Energy Modernisation of an Existing Public Building—A Case Study
Source: MDPI journal article supplement (doi:10.3390/en16083475), 2023-04-16
Supplement: s1 [file s1]

**Supplementary File S2 – Questionnaire of the decision-maker's preferences – Pairwise comparison matrices.**

**Economic preference**

|                    | $C_{T,BC,i}$ | $C_{D,IMP,i}$ | $C_{ENPE,TOTAL,i}$ | $C_{ENUE,RES,i}$ | $C_{EXN,ST,i}$ | $C_{EC,TOC,i}$ | $C_{ECP,INV,i}$ | $C_{SAQ,i}$ | $C_{S,LENV,i}$ | $C_{ENVLCA,i}$ |
|--------------------|--------------|---------------|--------------------|------------------|----------------|----------------|-----------------|-------------|----------------|----------------|
| $C_{T,BC,i}$       | 1.00         | 1.00          | 3.00               | 3.00             | 3.00           | 0.33           | 0.33            | 3.00        | 3.00           | 3.00           |
| $C_{D,IMP,i}$      | 1.00         | 1.00          | 3.00               | 3.00             | 3.00           | 0.33           | 0.33            | 3.00        | 3.00           | 3.00           |
| $C_{ENPE,TOTAL,i}$ | 0.33         | 0.33          | 1.00               | 1.00             | 1.00           | 0.20           | 0.20            | 0.50        | 0.50           | 1.00           |
| $C_{ENUE,RES,i}$   | 0.33         | 0.33          | 1.00               | 1.00             | 1.00           | 0.20           | 0.20            | 0.50        | 0.50           | 1.00           |
| $C_{EXN,ST,i}$     | 0.33         | 0.33          | 1.00               | 1.00             | 1.00           | 0.20           | 0.20            | 0.50        | 0.50           | 1.00           |
| $C_{EC,TOC,i}$     | 3.00         | 3.00          | 5.00               | 5.00             | 5.00           | 1.00           | 0.50            | 5.00        | 5.00           | 5.00           |
| $C_{ECP,INV,i}$    | 3.00         | 3.00          | 5.00               | 5.00             | 5.00           | 2.00           | 1.00            | 5.00        | 5.00           | 5.00           |
| $C_{SAQ,i}$        | 0.33         | 0.33          | 2.00               | 2.00             | 2.00           | 0.20           | 0.20            | 1.00        | 1.00           | 1.00           |
| $C_{S,LENV,i}$     | 0.33         | 0.33          | 2.00               | 2.00             | 2.00           | 0.20           | 0.20            | 1.00        | 1.00           | 1.00           |
| $C_{ENVLCA,i}$     | 0.33         | 0.33          | 1.00               | 1.00             | 1.00           | 0.20           | 0.20            | 1.00        | 1.00           | 1.00           |

**Social and environmental preference**

|                    | $C_{T,BC,i}$ | $C_{D,IMP,i}$ | $C_{ENPE,TOTAL,i}$ | $C_{ENUE,RES,i}$ | $C_{EXN,ST,i}$ | $C_{EC,TOC,i}$ | $C_{ECP,INV,i}$ | $C_{SAQ,i}$ | $C_{S,LENV,i}$ | $C_{ENVLCA,i}$ |
|--------------------|--------------|---------------|--------------------|------------------|----------------|----------------|-----------------|-------------|----------------|----------------|
| $C_{T,BC,i}$       | 1.00         | 1.00          | 0.50               | 0.50             | 1.00           | 1.00           | 1.00            | 0.33        | 0.20           | 1.00           |
| $C_{D,IMP,i}$      | 1.00         | 1.00          | 0.50               | 0.50             | 1.00           | 1.00           | 1.00            | 0.33        | 0.20           | 1.00           |
| $C_{ENPE,TOTAL,i}$ | 2.00         | 2.00          | 1.00               | 1.00             | 2.00           | 2.00           | 2.00            | 0.50        | 0.33           | 2.00           |
| $C_{ENUE,RES,i}$   | 2.00         | 2.00          | 1.00               | 1.00             | 2.00           | 2.00           | 2.00            | 0.50        | 0.33           | 2.00           |
| $C_{EXN,ST,i}$     | 1.00         | 1.00          | 0.50               | 0.50             | 1.00           | 1.00           | 1.00            | 0.33        | 0.20           | 1.00           |
| $C_{EC,TOC,i}$     | 1.00         | 1.00          | 0.50               | 0.50             | 1.00           | 1.00           | 1.00            | 0.33        | 0.20           | 1.00           |
| $C_{ECP,INV,i}$    | 1.00         | 1.00          | 0.50               | 0.50             | 1.00           | 1.00           | 1.00            | 0.33        | 0.20           | 1.00           |
| $C_{SAQ,i}$        | 3.00         | 3.00          | 2.00               | 2.00             | 3.00           | 3.00           | 3.00            | 1.00        | 0.50           | 3.00           |
| $C_{S,LENV,i}$     | 5.00         | 5.00          | 3.00               | 3.00             | 5.00           | 5.00           | 5.00            | 2.00        | 1.00           | 5.00           |
| $C_{ENVLCA,i}$     | 1.00         | 1.00          | 0.50               | 0.50             | 1.00           | 1.00           | 1.00            | 0.33        | 0.20           | 1.00           |
