# Supplementary material for: Application of the Hybrid MCDM Method for Energy Modernisation of an Existing Public Building—A Case Study
Source: MDPI journal article supplement (doi:10.3390/en16083475), 2023-04-16
Supplement: s1 [file s1]

## Supplementary File S1 – Direct-relation matrix, normalized direct-relation matrix and total-relation matrix.

### Direct-relation matrix

|                            | Direct-relation matrix |                        |                            |                          |                        |                       |                          |                     |                        |                        |              |
|----------------------------|------------------------|------------------------|----------------------------|--------------------------|------------------------|-----------------------|--------------------------|---------------------|------------------------|------------------------|--------------|
|                            | $\mathbf{CT\,T,BC,i}$  | $\mathbf{CT\,D,IMP,i}$ | $\mathbf{CEN\,PE,TOTAL,i}$ | $\mathbf{CEN\,UE,RES,i}$ | $\mathbf{CEX\,N,ST,i}$ | $\mathbf{CEC\,TOC,i}$ | $\mathbf{CEC\,PC,INV,i}$ | $\mathbf{CS\,AQ,i}$ | $\mathbf{CS\,I,ENV,i}$ | $\mathbf{CENV\,LCA,i}$ |              |
| $\mathbf{CT\,T,BC,i}$      | 0.00                   | 3.35                   | 0.00                       | 0.00                     | 0.00                   | 0.00                  | 0.36                     | 0.00                | 0.00                   | 1.59                   | <b>5.3</b>   |
| $\mathbf{CT\,D,IMP,i}$     | 0.00                   | 0.00                   | 0.00                       | 0.00                     | 0.00                   | 0.23                  | 1.07                     | 0.00                | 0.00                   | 1.27                   | <b>2.57</b>  |
| $\mathbf{CEN\,PE,TOTAL,i}$ | 0.00                   | 0.00                   | 0.00                       | 0.00                     | 0.00                   | 0.00                  | 0.00                     | 0.00                | 1.13                   | 0.00                   | <b>1.13</b>  |
| $\mathbf{CEN\,UE,RES,i}$   | 0.00                   | 0.00                   | 4.91                       | 0.00                     | 0.00                   | 0.99                  | 0.00                     | 0.00                | 0.42                   | 0.35                   | <b>6.67</b>  |
| $\mathbf{CEX\,N,ST,i}$     | 0.00                   | 0.00                   | 3.21                       | 1.48                     | 0.00                   | 1.44                  | 0.96                     | 0.79                | 1.78                   | 1.18                   | <b>10.84</b> |
| $\mathbf{CEC\,TOC,i}$      | 0.00                   | 0.00                   | 0.00                       | 0.00                     | 0.00                   | 0.00                  | 0.00                     | 0.00                | 0.00                   | 0.45                   | <b>0.45</b>  |
| $\mathbf{CEC\,PC,INV,i}$   | 0.00                   | 0.00                   | 0.00                       | 0.21                     | 0.00                   | 1.36                  | 0.00                     | 0.00                | 0.00                   | 0.00                   | <b>1.57</b>  |
| $\mathbf{CS\,AQ,i}$        | 0.11                   | 0.00                   | 0.00                       | 0.00                     | 0.00                   | 0.76                  | 1.84                     | 0.00                | 0.05                   | 0.00                   | <b>2.76</b>  |
| $\mathbf{CS\,I,ENV,i}$     | 0.00                   | 0.00                   | 0.00                       | 0.00                     | 0.00                   | 0.16                  | 0.41                     | 0.00                | 0.00                   | 0.00                   | <b>0.57</b>  |
| $\mathbf{CENV\,LCA,i}$     | 0.00                   | 0.00                   | 0.00                       | 0.00                     | 0.00                   | 0.00                  | 1.09                     | 0.00                | 0.19                   | 0.00                   | <b>1.28</b>  |
|                            | <b>0.11</b>            | <b>3.35</b>            | <b>8.12</b>                | <b>1.69</b>              | <b>0</b>               | <b>4.94</b>           | <b>5.73</b>              | <b>0.79</b>         | <b>3.57</b>            | <b>4.84</b>            |              |

### Normalized direct-relation matrix

X

|                            | Normalized matrix     |                        |                            |                          |                        |                       |                          |                     |                        |                        |             |
|----------------------------|-----------------------|------------------------|----------------------------|--------------------------|------------------------|-----------------------|--------------------------|---------------------|------------------------|------------------------|-------------|
|                            | $\mathbf{CT\,T,BC,i}$ | $\mathbf{CT\,D,IMP,i}$ | $\mathbf{CEN\,PE,TOTAL,i}$ | $\mathbf{CEN\,UE,RES,i}$ | $\mathbf{CEX\,N,ST,i}$ | $\mathbf{CEC\,TOC,i}$ | $\mathbf{CEC\,PC,INV,i}$ | $\mathbf{CS\,AQ,i}$ | $\mathbf{CS\,I,ENV,i}$ | $\mathbf{CENV\,LCA,i}$ |             |
| $\mathbf{CT\,T,BC,i}$      | 0.00                  | 0.31                   | 0.00                       | 0.00                     | 0.00                   | 0.00                  | 0.03                     | 0.00                | 0.00                   | 0.15                   | <b>0.49</b> |
| $\mathbf{CT\,D,IMP,i}$     | 0.00                  | 0.00                   | 0.00                       | 0.00                     | 0.00                   | 0.02                  | 0.10                     | 0.00                | 0.00                   | 0.12                   | <b>0.24</b> |
| $\mathbf{CEN\,PE,TOTAL,i}$ | 0.00                  | 0.00                   | 0.00                       | 0.00                     | 0.00                   | 0.00                  | 0.00                     | 0.00                | 0.10                   | 0.00                   | <b>0.10</b> |
| $\mathbf{CEN\,UE,RES,i}$   | 0.00                  | 0.00                   | 0.45                       | 0.00                     | 0.00                   | 0.09                  | 0.00                     | 0.00                | 0.04                   | 0.03                   | <b>0.62</b> |
| $\mathbf{CEX\,N,ST,i}$     | 0.00                  | 0.00                   | 0.30                       | 0.14                     | 0.00                   | 0.13                  | 0.09                     | 0.07                | 0.16                   | 0.11                   | <b>1.00</b> |
| $\mathbf{CEC\,TOC,i}$      | 0.00                  | 0.00                   | 0.00                       | 0.00                     | 0.00                   | 0.00                  | 0.00                     | 0.00                | 0.00                   | 0.04                   | <b>0.04</b> |
| $\mathbf{CEC\,PC,INV,i}$   | 0.00                  | 0.00                   | 0.00                       | 0.02                     | 0.00                   | 0.13                  | 0.00                     | 0.00                | 0.00                   | 0.00                   | <b>0.14</b> |
| $\mathbf{CS\,AQ,i}$        | 0.01                  | 0.00                   | 0.00                       | 0.00                     | 0.00                   | 0.07                  | 0.17                     | 0.00                | 0.00                   | 0.00                   | <b>0.25</b> |
| $\mathbf{CS\,I,ENV,i}$     | 0.00                  | 0.00                   | 0.00                       | 0.00                     | 0.00                   | 0.01                  | 0.04                     | 0.00                | 0.00                   | 0.00                   | <b>0.05</b> |
| $\mathbf{CENV\,LCA,i}$     | 0.00                  | 0.00                   | 0.00                       | 0.00                     | 0.00                   | 0.00                  | 0.10                     | 0.00                | 0.02                   | 0.00                   | <b>0.12</b> |
|                            | <b>0.01</b>           | <b>0.31</b>            | <b>0.75</b>                | <b>0.16</b>              | <b>0.00</b>            | <b>0.46</b>           | <b>0.53</b>              | <b>0.07</b>         | <b>0.33</b>            | <b>0.45</b>            |             |

## Total-relation matrix

| $X(I-X)^{-1}$       | Matrix T<br>Total-relation matrix |                 |                     |                   |                 |                |                   |              |                 |                 |
|---------------------|-----------------------------------|-----------------|---------------------|-------------------|-----------------|----------------|-------------------|--------------|-----------------|-----------------|
|                     | $c_{T,BC,i}$                      | $c_{T,D,IMP,i}$ | $c_{EN,PE,TOTAL,i}$ | $c_{EN,UE,RES,i}$ | $c_{EX,N,ST,i}$ | $c_{EC,TOC,i}$ | $c_{EC,PC,INV,i}$ | $c_{S,AQ,i}$ | $c_{S,I,ENV,i}$ | $c_{ENV,LCA,i}$ |
| $c_{T,BC,i}$        | 0.00                              | 0.31            | 0.00                | 0.00              | 0.00            | 0.02           | 0.08              | 0.00         | 0.00            | 0.18            |
| $c_{T,D,IMP,i}$     | 0.00                              | 0.00            | 0.00                | 0.00              | 0.00            | 0.04           | 0.11              | 0.00         | 0.00            | 0.12            |
| $c_{EN,PE,TOTAL,i}$ | 0.00                              | 0.00            | 0.00                | 0.00              | 0.00            | 0.00           | 0.00              | 0.00         | 0.10            | 0.00            |
| $c_{EN,UE,RES,i}$   | 0.00                              | 0.00            | 0.45                | 0.00              | 0.00            | 0.09           | 0.01              | 0.00         | 0.09            | 0.04            |
| $c_{EX,N,ST,i}$     | 0.00                              | 0.00            | 0.36                | 0.14              | 0.00            | 0.17           | 0.12              | 0.07         | 0.21            | 0.12            |
| $c_{EC,TOC,i}$      | 0.00                              | 0.00            | 0.00                | 0.00              | 0.00            | 0.00           | 0.00              | 0.00         | 0.00            | 0.04            |
| $c_{EC,PC,INV,i}$   | 0.00                              | 0.00            | 0.01                | 0.02              | 0.00            | 0.13           | 0.00              | 0.00         | 0.00            | 0.01            |
| $c_{S,AQ,i}$        | 0.01                              | 0.00            | 0.00                | 0.00              | 0.00            | 0.09           | 0.17              | 0.00         | 0.00            | 0.01            |
| $c_{S,I,ENV,i}$     | 0.00                              | 0.00            | 0.00                | 0.00              | 0.00            | 0.02           | 0.04              | 0.00         | 0.00            | 0.00            |
| $c_{ENV,LCA,i}$     | 0.00                              | 0.00            | 0.00                | 0.00              | 0.00            | 0.01           | 0.10              | 0.00         | 0.02            | 0.00            |
